# Supplementary material
Source: MDPI journal article supplement (https://www.mdpi.com/2073-4395/13/3/710)
Supplement: s1 [file s1]

## Supplementary Materials:

### Optimizing management practices under straw regimes for global sustainable agricultural production

Pengfei Li <sup>1,2</sup>, Afeng Zhang <sup>1,2,\*</sup>, Shiwei Huang <sup>1,2</sup>, Jiale Han <sup>1,2</sup>, Xiangle Jin <sup>1,2</sup>, Xiaogang Shen <sup>1,2</sup>,

Qaiser Hussain <sup>3</sup>, Xudong Wang <sup>1,2</sup>, Jianbin Zhou <sup>1,2</sup> and Zhujun Chen <sup>1,2</sup>

<sup>1</sup> College of Natural Resources and Environment, Northwest A&F University,  
Yangling 712100, China

<sup>2</sup> Key Laboratory of Plant Nutrition and the Agro-environment in Northwest China,  
Ministry of Agriculture, Yangling 712100, China

<sup>3</sup> Institute of Soil Science, Pir Mehr Ali Shah Arid Agriculture University,  
Rawalpindi P.O BOX. 46300, Pakistan

*\* Corresponding author: Afeng Zhang, Email: Zhangafeng@nwsuaf.edu.cn*

**Data S1.** Source references of all datasets used in this meta-analysis.

**Data S1. References of all datasets included in this meta-analysis.**

- Abalos D. et al., 2013. Role of maize stover incorporation on nitrogen oxide emissions in a non-irrigated Mediterranean barley field. *Plant Soil*, 364, 357-371.
- Acharya B. et al., 2019. Winter cover crops effect on soil moisture and soybean growth and yield under different tillage systems. *Soil and Tillage Research*, 195, 104430.
- Adiku S. et al., 2009. Effects of crop rotation and fallow residue management on maize growth, yield and soil carbon in a savannah-forest transition zone of Ghana. *Journal of Agricultural Science*, 147(03), 313-322.
- Adimassu, Z. et al., 2019. Effects of tillage and crop residue management on runoff, soil loss and crop yield in the humid highlands of Ethiopia. *Agricultural Systems*, 168, 11-18.
- Akhtar K. et al., 2018. Changes in soil enzymes, soil properties, and maize crop productivity under wheat straw mulching in Guanzhong, China. *Soil and Tillage Research*, 182, 94-102.
- Akhtar K. et al., 2019. Integrated use of straw mulch with nitrogen fertilizer improves soil functionality and soybean production. *Environment International*, 132, 105092.
- Akhtar K. et al., 2020. Straw mulching with inorganic nitrogen fertilizer reduces soil CO<sub>2</sub> and N<sub>2</sub>O emissions and improves wheat yield. *Science of the Total Environment* 741, 140488.
- Akiyama H. et al., 2020. Effect of low C/N crop residue input on N<sub>2</sub>O, NO, and CH<sub>4</sub> fluxes from andosol and fluvisol fields. *Science of the Total Environment*, 713, 136677.
- Aulakh M. et al., 2001. Denitrification, N<sub>2</sub>O and CO<sub>2</sub> fluxes in rice-wheat cropping system as affected by crop residues, fertilizer N and legume green manure. *Biol Fertility Soils*, 34, 375-389.
- Baggs E. et al., 2002. Nitrous oxide release from soils receiving N-rich crop residues and paper mill sludge in eastern Scotland. *Agriculture, Ecosystems and Environment*, 90, 109-123.
- Baggs E. et al., 2000. Nitrous oxide emission from soils after incorporating crop residues. *Soil Use and Management*, 16, 82-87.
- Baggs E. et al., 2003. Nitrous oxide emissions following application of residues and fertilizer under zero and conventional tillage. *Plant and Soil*, 254, 361-370.
- Bahrani M. et al., 2007. Influence of wheat residue management on irrigated corn grain production in a reduced tillage system. *Soil and Tillage Research*, 94, 305-309.
- Bai J. et al., 2021. Straw returning and one-time application of a mixture of controlled release and solid granular urea to reduce carbon footprint of plastic film mulching spring maize. *Journal of Cleaner Production*, 280, 124478.
- Bai N. et al., 2020. Long-term effects of straw return and straw-derived biochar amendment on bacterial communities in soil aggregates. *Scientific Reports*, 10(1), 7891.
- Bakht J. et al., 2009. Influence of crop residue management, cropping system and N fertilizer on soil N and C dynamics and sustainable wheat (*Triticum aestivum* L.) production. *Soil and Tillage Research*, 104, 233-240.
- Bao J. et al., 2020. Effects of biochar application and straw returning on organic carbon fractionations and microbial activities in a red soil. *Acta Pedologica Sinica*, 57(03), 721-729 (In Chinese with an English abstract).
- Barber S., 1979. Corn residue management and soil organic matter. *Agronomy Journal*, 71, 625-627.
- Belay A. et al., 1997. Effect of crop residues on grain yield response of sorghum (*Sorghum bicolor*) (L.) to application of N and P fertilizer. *Nutrient Cycling in Agroecosystems*, 48,

191-196.

- Bent E. et al., Residue management leading to higher field-scale N<sub>2</sub>O flux is associated with different soil bacterial nitrifier and denitrifier gene community structures. *Applied Soil Ecology* 108, 288-299.
- Bertora C. et al., 2018. Dissolved organic carbon cycling, methane emissions and related microbial populations in temperate rice paddies with contrasting straw and water Management. *Agriculture, Ecosystems and Environment*, 265, 292-306.
- Bianca N. et al., 2008. Long-term effects of harvesting maize stover and tillage on soil quality. *Soil Science Society of America Journal*, 72(4), 960-969.
- Black A. 1973. Soil property changes associated with crop residue management in a wheat-fallow rotation. *Antiviral Research*, 26(6):274-274(1).
- Blanco-Canqui H. et al., 2006. Changes in long-term no-till corn growth and yield under different rates of stover mulch. *Agronomy Journal*, 98(4), 1128-1136.
- Blanco-Canqui H. and Lal R., 2007. Soil structure and organic carbon relationships following 10 years of wheat straw management in no-till. *Soil and Tillage Research*, 95(1-2):240-254.
- Blanco-Canqui H. and Lal R. 2008. Corn Stover removal for expanded uses reduces soil fertility and structural stability. *Soil Water Management and Conservation*, 73, 418-426.
- Blanco-Canqui R. and Lal R. 2009. Crop residue removal impacts on soil productivity and environmental quality. *Critical Reviews in Plant Science*, 28, 139-163.
- Blazier A. et al., Straw harvesting, fertilization, and fertilizer type alter soil microbiological and physical properties in a loblolly pine plantation in the mid-south USA. *Biology and Fertility of Soils* 45, 145-153.
- Bolo P. et al., 2021. Application of residue, inorganic fertilizer and lime affect phosphorus solubilizing microorganisms and microbial biomass under different tillage and cropping systems in a Ferralsol. *Geoderma*, 390, 114962.
- Brennan B. et al., 2014. The effect of tillage system and residue management on grain yield and nitrogen use efficiency in winter wheat in a cool Atlantic climate. *European Journal of Agronomy*, 54, 61-69.
- Cao P. et al., 2019. Short-term effects of different cropping patterns on soil labile organic carbon fractions and yields of paddy fields. *Chinese Journal of Ecology*, 38(9), 2788-2798 (In Chinese with an English abstract).
- Chatterjee S. et al., 2018. Effects of irrigation, crop residue mulch and nitrogen management in maize (*Zea mays* L.) on soil carbon pools in a sandy loam soil of Indo-gangetic plain region. *Catena*, 165, 207-216.
- Chen D. et al., 2018. Response of CH<sub>4</sub> emissions to straw and biochar applications in double-rice cropping systems: Insights from observations and modeling. *Environmental Pollution*, 235, 95-103.
- Chen H. et al., 2017. Effects of straw and plastic film mulching on greenhouse gas emissions in Loess Plateau, China: A field study of 2 consecutive wheat-maize rotation cycles. *Science of the Total Environment*, 579, 814-824.
- Chen J. et al., 2015. Research on the influence of straw returning on the emission of methane in the North. *Agricultural Science and Technology and Equipment*, (6), 8-13 (In Chinese with an English abstract).
- Chen J. et al. 2017. Straw return and appropriate tillage method improve grain yield and

- nitrogen efficiency of winter wheat. *Journal of Integrative Agriculture*, 16(8), 1708-1719.
- Chen J., 2018. Effects of straw returning on soil physicochemical properties and wheat yield. *Rural science and technology*, (17):113-114 (In Chinese with an English abstract).
- Chen J. et al., 2018. Effects of straw and biochar amendent on greenhouse gases emissions in wheat-maize rotation cropland in Guanzhong area. *Research of Soil and Water Conservation*, 25(5), 170-178 (In Chinese with an English abstract).
- Chen S. et al., 2006. Decomposition characteristics of straw return to soil and its effect on soil fertility in purple hilly region. *Journal of Soil and Water Conesevation*, 20(6), 141-144 (In Chinese with an English abstract).
- Chen X. et al., Characteristic variations of N<sub>2</sub>O flux in winter wheat field under different tillage methods. *Agricultural Research in the Arid Areas*, 34(3), 221-227 (In Chinese with English abstract).
- Cheng G. et al., 2017. Comparative analysis on effect of wheat straw and its biochar amendment on net global warming potential under wheat-maize rotation ecosystem in the Guanzhong plain. *Environmental Science*, 38(2), 792-801 (In Chinese with an English abstract).
- Cheng G., 2017. Study on The effects of wheat straw and biochar on greenhouse gas emissions from dry land. Northwest Agriculture and Forestry University (In Chinese with an English abstract).
- Cheng G. et al., 2019. Effects of biochar and straw on greenhouse gas fluxes of corn fields in arid regions Chinese Journal of Eco-Agriculture, 27(7), 1004-1014 (In Chinese with an English abstract).
- Cheng M. et al., 2019. Effects of long-term straw return on corn yield, soil nutrient contents and enzyme activities in dryland of the Loess Plateau, China. *Chinese Journal of Eco-Agriculture*, 27(10), 1528-1536 (In Chinese with an English abstract).
- Choudhary V. et al., 2020. Crop residue and weed biomass incorporation with microbial inoculation improve the crop and soil productivity in the rice (*Oryza sativa* L.) -toria (*Brassica rapa* L.) cropping system. *Environmental and Sustainability Indicators*, 7, 100048.
- Choudhury S. et al., 2014. Tillage and residue management effects on soil aggregation, organic carbon dynamics and yield attribute in rice-wheat cropping system under reclaimed sodic soil. *Soil and Tillage Research*, 136, 76-83.
- Cochran V. et al., 1982. Effect of crop residue management and tillage on water use efficiency and yield of winter wheat. *Agronomy Journal*, 74(6), 929-932.
- Corton T. et al., 2000. Methane emission from irrigated and intensively managed rice fields in Central Luzon (Philippines). *Nutrient Cycling in Agroecosystems*, 58, 37-53.
- Cui Y. et al., 2017. Effects of straw and biochar addition on soil nitrogen, carbon, and super rice yield in cold waterlogged paddy soils of North China. *Journal of Integrative Agriculture*, 16(5), 1064-1074.
- Cupta N. et al., 2016. Effects of tillage and mulch on the growth, yield and irrigation water productivity of a dry seeded rice-wheat cropping system in north-west India. *Field Crops Research*, 196, 219-236.
- Curtin D. and Fraser P., 2003. Soil organic matter as influenced by straw management practices and inclusion of grass and clover seed crops in cereal rotations. *Australian Journal of Soil Research*, 41, 95-106.
- Dam R. et al., 2005. Soil bulk density and crop yield under eleven consecutive years of corn

- with different tillage and residue practices in a sandy loam soil in central Canada. *Soil and Tillage Research*, 84, 41-53.
- Dai Z. et al., 2012. Effects of straw returning on soil physical and chemical properties under different tillage modes. *China Agricultural Technology Extension*. 28(3), 46-48 (In Chinese with English abstract).
- Dawar K. et al., 2020. Effects of the nitrification inhibitor nitrapyrin and mulch on N<sub>2</sub>O emission and fertilizer use efficiency using <sup>15</sup>N tracing techniques. *Science of the Total Environment*, 757.
- Dendooven L. et al., 2012. Global warming potential of agricultural systems with contrasting tillage and residue management in the central highlands of Mexico. *Agriculture, Ecosystems and Environment*, 152, 50-58.
- Deng Q. et al., 2018. Effects of long-term straw returning on soil structure and microbial diversity in paddy and drought rotation. *Journal of Yangtze University (Natural Science Edition)*, 15(2), 14-18 (In Chinese with an English abstract).
- Devkota M. et al., 2013. Combining permanent beds and residue retention with nitrogen fertilization improves crop yields and water productivity in irrigated arid lands under cotton, wheat and maize. *Field Crops Research*, 149, 105-114.
- Dong Q. et al., 2018. Effects of straw mulching and plastic film mulching on improving soil organic carbon and nitrogen fractions, crop yield and water use efficiency in the Loess Plateau, China. *Agricultural Water Management*, 201, 133-143.
- Dong Q. et al., 2019. Effect of different mulching measures on nitrate nitrogen leaching in spring maize planting system in south of Loess Plateau. *Agricultural Water Management*, 213, 654-658.
- Dong W. et al., 2017. Impact of tillage management on the short- and long-term soil carbon dioxide emissions in the dryland of Loess Plateau in China. *Geoderma*, 307, 38-4
- Dong Y. et al., 2007. Influence of different fertilization on CO<sub>2</sub> and N<sub>2</sub>O fluxes from agricultural soil. *Soil and Fertilizer Sciences in China*, 4, 34-39 (In Chinese with an English abstract).
- Dossou-Yovo E. et al., 2016. Reducing soil CO<sub>2</sub> emission and improving upland rice yield with no-tillage, straw mulch and nitrogen fertilization in northern Benin. *Soil and Tillage Research*, 156, 44-53.
- Ebrahimian E. et al., 2016. The effect of tillage and wheat residue management on nitrogen uptake efficiency and nitrogen harvest index in wheat. *Turkish Journal of Field Crops*, 21(2), 233-239.
- Eusufzai M. et al., 2011. Effect of rice straw application on CH<sub>4</sub> emission in continuous and recently converted paddy field. *Journal of Agricultural Meteorology*, 67(3), 185-192.
- Fan M. et al., 2019. Effects of mulching on soil CO<sub>2</sub> fluxes, hay yield and nutritional yield in a forage maize field in Northwest China. *Scientific Reports*, 9(1), 1-7.
- Feng J. et al., 2019. Effects of tillage and straw returning methods on N<sub>2</sub>O emission from paddy fields, nitrogen uptake of rice plant and grain yield. *Acta Agronomica Sinica*, 45(8), 1250-1259 (In Chinese with an English abstract).
- Fischer R. et al., 2002. Crop rotation, tillage and crop residue management for wheat and maize in the sub-humid tropical highlands I. Wheat and legume performance. *Field Crops Research* 79, 107-122.
- Fuentes M. et al., 2009. Fourteen years of applying zero and conventional tillage, crop rotation

- and residue management systems and its effect on physical and chemical soil quality. *European Journal of Agronomy*, 30, 228-237.
- Gao H. et al., 2017. Emission characteristics of greenhouse gas from maize field of black soil region under long-term fertilization. *Journal of Agricultural Resources and Environment*, 34(5), 422-430 (In Chinese with an English abstract).
- Gao J. et al., 2020. Improving organic matter content and nitrogen supply stability of double cropping rice field through co-incorporation of green manure and rice straw. *Journal of Plant Nutrition and Fertilizers*, 26(3), 472-480 (In Chinese with an English abstract).
- Gao L. et al., 2015. Effects of straw returned on the spring wheat yield and soil fertility under drip irrigation. *Chinese Journal of Soil Science*, 46(5), 1155-1160 (In Chinese with an English abstract).
- Ghimire R. et al., 2012. Soil organic carbon sequestration as affected by tillage, crop residue, and nitrogen application in rice-wheat rotation system, *Paddy Water Environment*, 10, 95-102.
- Gong Z. et al., 2015. CO<sub>2</sub> emissions law research and characteristics of carbon balance of corn field in Songnen Plain. *Journal of Northeast Agricultural University*, 46(9), 9-15 (In Chinese with an English abstract).
- Gonzaga, L. et al., 2018. Crop residue removal and nitrification inhibitor application as strategies to mitigate N<sub>2</sub>O emissions in sugarcane fields. *Biomass and Bioenergy*, 119, 206-216.
- Govaerts B. et al., 2007. Influence of tillage, residue management, and crop rotation on soil microbial biomass and catabolic diversity. *Applied soil ecology*, 37, 18-30.
- Govaerts B. et al., 2007. Influence of permanent raised bed planting and residue management on physical and chemical soil quality in rain fed maize/wheat systems. *Plant Soil*, 291, 39-54.
- Guo J. et al., 2020. Effects of continuous straw returning on soil physical and chemical properties and crop yield. *Journal of Agricultural Sciences*, 41(1), 1-6 (In Chinese with English abstract).
- Guo T. et al., 2016. Effect of fertilizer management on greenhouse gas emission and nutrient status in paddy soil. *Journal of Plant Nutrition and Fertilizer*, 22(2), 337-345 (In Chinese with an English abstract).
- Gursoy S. et al., 2010. Short-term effects of tillage and residue management following cotton on grain yield and quality of wheat. *Field Crops Research*, 119, 260-268.
- Han J. et al., 2016. Contrasting effect of straw return and its biochar on changes in crop yield and integrated global warming effects under different nitrogen levels. *Journal of Nanjing Agricultural University*, 39(6), 986-995 (In Chinese with an English abstract).
- Han Y. et al., 2017. Effects of agricultural wastes on greenhouse gas emission and global warming potential in black soil. *Journal of South China Agricultural University*, 38(5), 36-42 (In Chinese with an English abstract).
- Hang Y. et al., 2017. Effects of water regimes and straw incorporation on greenhouse gas emissions in a rice-wheat cropping system. *Ecology and Environmental Sciences*, 26(11), 1844-1855 (In Chinese with an English abstract).
- Hao Y. et al., 2017. Effects of long-term organic amendments on soil N<sub>2</sub>O emissions from winter wheat-maize cropping systems in the Guanzhong Plain. *Environmental Science*, 38(6),

- 2586-2593 (In Chinese with an English abstract).
- Hartmann T. et al., 2020. Turnover of urea in a soil from the north china plain as affected by the urease inhibitor NBPT and wheat straw. *Agronomy*, 10(6), 857.
- Hazarika S. et al., 2009. Effect of tillage system and straw management on organic matter dynamics. *Agronomy for Sustainable Development*, 29, 525-533.
- He Q. et al., 2015. Effects of different mechanical tillage methods on soil physical and chemical properties and rice yield with straw returning. *Acta Agricultural Shanghai*, 319(5), 66-69 (In Chinese with English abstract).
- Hou R. et al., Effects of biochar and straw on greenhouse gas emission and its response mechanism in seasonally frozen farmland ecosystems. *Catena* 194, 104735.
- Hou X. et al., 2012. Greenhouse gases emission from paddy fields under different rice straw treatments. *China Environmental Science*, 32(5), 803-809 (In Chinese with English abstract).
- Houshyar E. et al., 2020. The impacts of tillage, fertilizer and residue managements on the soil properties and wheat production in a semi-arid region of Iran. *Journal of the Saudi Society of Agricultural Sciences*, 19, 225-232.
- Hu C. et al., 2017. Effects of different crop straw returning to soil on soil physico-chemical properties and rice yield. *Hubei Agricultural Sciences*, 56(10), 1854-1856 (In Chinese with English abstract).
- Hu N. et al., 2016. Effects of different straw returning modes on greenhouse gas emissions and crop yields in a rice-wheat rotation system *Agriculture. Ecosystems and Environment*, 223, 115-122.
- Hu N. et al., 2018. Effects of different straw returning modes on carbon footprint in a rice-wheat rotation system. *Resources and Environment in the Yangtze Basin*, 27(12), 2775-2783 (In Chinese with English abstract).
- Huang D. et al., 2018. Impact of agricultural waste return on soil greenhouse gas emissions. *Applied ecology and environmental Research*, 17(1), 1321-1335.
- Huang F. et al., 2019. Effects of different long-term farmland mulching practices on the loessial soil fungal community in a semiarid region of China. *Applied Soil Ecology*, 137, 111-119.
- Huang X. et al., 2018. Abundance of microbial CO<sub>2</sub>-fixing genes during the late rice season in a long-term management paddy field amended with straw and straw-derived biochar. *Canadian Journal of Soil Science*, 98, 306-316.
- Huong N., 2016. Effects of biochar amendment on soil quality, crop yield in northwest China. *Northwest Agriculture and Forestry University* (In Chinese with an English abstract).
- Ishaque W. et al., 2018. Short-term effects of tillage and residue management practices on dry matter yield and fate of <sup>15</sup>N-urea in a continuous maize cropping system under subtropical conditions. *Soil and Tillage Research*, 182, 78-85.
- Jat M. et al., 2017. Crop residue management for sustainable production of mize (*Zea Mays*) in dryland ecosystem. *Chemical Science Review and Letters*, 6(23), 1681-1686.
- Jat R. et al., 2014. Seven years of conservation agriculture in a rice-wheat rotation of Eastern Gangetic Plains of South Asia: Yield trends and economic profitability. *Field Crops Research*, 164, 199-210.
- Jermasawatdipong P. et al., 1994. Methane emission from plots with differences in fertilizer application in Thai Paddy Fields. *Soil Science and Plant Nutrition*, 40(1), 63-71.
- Jia Q. et al., 2020. Planting practices and mulching materials improve maize net ecosystem C



- budget, global warming potential and production in semi-arid regions. *Soil and Tillage Research*, 207(3), 104850.
- Jiang B. et al., 2014. Effects on emission of greenhouse gas by different tillage treatments to winter wheat in polder areas. *Journal of Anhui Agricultural University*, 41(2), 241-247 (In Chinese with English abstract).
- Jin H. et al., 2017. Influence of straw returning patterns on methane and nitrous oxide emission during wheat-growing season in a rice-wheat double cropping system. *Jiangsu Journal of Agricultural Sciences*, 33(2), 333-339 (In Chinese with an English abstract).
- Jha P. et al., 1996. Effect of fertilizer and organic matter inputs on nitrifier populations and N-mineralization rates in a dry tropical region, India. *Applied Soil Ecology*, 4, 231-241.
- Kan Z. et al., 2020. Characteristics of carbon mineralization and accumulation under long-term conservation tillage. *Catena*, 193, 104636.
- Kaewpradit W. et al., 2008. Regulating mineral N release and greenhouse gas emissions by mixing groundnut residues and rice straw under field conditions. *European Journal of Soil Science*, 59, 640-652.
- Kesenheimer K. et al., 2018. Nitrous oxide emissions after incorporation of winter oilseed rape (*Brassica napus* L.) residues under two different tillage treatments. *Journal of Plant Nutrition and Soil Science*, 0, 1-12.
- Kim G. et al., 2017. Nitrous oxide emissions from soils amended by cover-crops and under plastic film mulching: Fluxes, emission factors and yield-scaled emissions. *Atmospheric Environment*, 152, 277-388.
- Koga N. and Tsuji H., 2009. Effects of reduced tillage, crop residue management and manure application practices on crop yields and soil carbon sequestration on an Andisol in northern Japan. *Soil Science and Plant Nutrition*, 55(4), 546-557.
- Koga N. et al., 2016. Differences in CO<sub>2</sub> and N<sub>2</sub>O emission rates following crop residue incorporation with or without field burning: A case study of adzuki bean residue and wheat straw. *Soil Science and Plant Nutrition*, 62(1), 52-56.
- Ko J. et al., 2002. Effects of cultural practices on methane emission in tillage and no-tillage practice from rice paddy fields. *Korean Soil Science and Fertilizer*, 35(4), 216-222.
- Kouyate Z. et al., 2000. Tillage, crop residue, legume rotation, and green manure effects on sorghum and millet yields in the semiarid tropics of Mali. *Plant and Soil*, 225, 141-151.
- Kravchenko AG. et al., 2007. Effect of winter wheat crop residue on no-till corn growth and development. *Agronomy Journal*, 99(2), 549-555.
- Lal B. et al., 2019. Energy and carbon budgeting of tillage for environmentally clean and resilient soil health of rice-maize cropping system. *Journal of Cleaner Production* 226, 815-830.
- Lal R., 1980. Changes in properties of a newly cleared tropical alfisol as affected by mulching. *Soil Science Society of America Journal*, 44, 828-833.
- Lan Y. et al., 2015. Effects of different straw incorporation ways on N<sub>2</sub>O emission and soil physicochemical properties of brown soil. *Chinese Journal of Ecology*, 34( 3), 790-796 (In Chinese with an English abstract).
- Larson W. et al., 1972. Effects of increasing amounts of organic residues on continuous corn: II. organic carbon, nitrogen, phosphorus, and sulfur. *Agronomy Journal*, 64(2), 204-209.
- Lenka N. and Lal R., 2013. Soil aggregation and greenhouse gas flux after 15 years of wheat

- straw and fertilizer management in a no-till system. *Soil and Tillage Research*, 126,78-89.
- Li C. et al., 2011. Effects of rape residue mulch on greenhouse gas emissions and carbon sequestration from no-tillage rice fields. *Journal of Agro-Environment Science*, 30(11), 2362-2367 (In Chinese with an English abstract).
- Li F. et al., 2008. Effects of tillage styles and straw return on soil properties and crop yields in direct seeding rice. *Chinese Journal of Soil Science*, 39(3), 549-552 (In Chinese with an English abstract).
- Li F. et al., 2015. Fate of nitrogen from green manure, straw, and fertilizer applied to wheat under different summer fallow management strategies in dryland. *Biology and fertility of soils*, 51, 769-780.
- Li J. et al., 2018. Effects of straw and biochar addition on soil carbon balance and ecological benefits in a rape-maize rotation planting system. *Environmental Science*, 39(9), 4338-4347 (In Chinese with an English abstract).
- Li L. et al., 2011. Effect of straw returning to field on physical properties, enzyme activity of saline-alkali soils and yield of oil sunflower. *Acta Agricultural Boreali-occidentalis Sinica*, 28(12), 1997-2004 (In Chinese with an English abstract).
- Li Q. et al., 2016. Effects of cotton (*Gossypium hirsutum* L.) straw and its biochar application on  $\text{NH}_3$  volatilization and N use efficiency in a drip-irrigated cotton field. *Soil Science and Plant Nutrition*, 62(5-6), 534-544.
- Li T. et al., 2019. Influence of green manure and rice straw management on soil organic carbon, enzyme activities, and rice yield in red paddy soil. *Soil and Tillage Research*, 195, 104428.
- Li W. et al., 2020. Effects of nitrogen fertilizer and returning straw on aquaculture water, soil nutrients, and enzyme activity in rice-crayfish fields during winter and spring. *Chinese Journal of Eco-Agriculture*, 28(7), 1051-1060 (In Chinese with an English abstract).
- Li X. et al., 2014. Methane and nitrous oxide emissions from irrigated lowland rice paddies after wheat straw application and midseason aeration. *Nutrient Cycling in Agroecosystems*, 100, 65-76.
- Li X. et al., 2015. Effects of different return modes of wheat straws on greenhouse gas emissions and carbon sequestration of maize fields. *Journal of Agro-Environment Science*, 34(11), 2228-2235 (In Chinese with an English abstract).
- Li X. et al., 2016. Characteristics of greenhouse gas emissions from the wheat fields with different returning methods of maize straws. *Journal of Agricultural Resources and Environment*, 33(2), 176-181 (In Chinese with an English abstract).
- Li Y. et al., 2017. Effects of mulching straw at different rates on water use pattern and soil properties of dry-land wheat. *Agricultural Research in the Arid Areas*, 35(4), 217-229 (In Chinese with an English abstract).
- Li Z. et al., 2018. In search of long-term sustainable tillage and straw mulching practices for a maize-winter wheat-soybean rotation system in the Loess Plateau of China. *Field Crops Research*, 217,199-210.
- Linden D. et al., 2000. Long-term corn grain and stover yields as a function of tillage and residue removal in east central Minnesota. *Soil and Tillage Research*, 56, 167-174.
- Lin et al., 2020. Effect of long-term application of biochar and straw on soil organic carbon in purple soil aggregates of sloping uplands. *Chinese Journal of Eco-Agriculture*, 28(1), 96-103 (In Chinese with an English abstract).

- Liu D., 2015. Effects of straw returning and biochar amendment on soil properties, rice growth and greenhouse gas emission. Nanjing Agricultural University (In Chinese with an English abstract).
- Liu G. et al., 2019. Effects of straw incorporation methods on nitrous oxide and methane emissions from a wheat-rice rotation system. *Pedosphere*, 29(2): 204-215.
- Liu H. et al., 2013. Effect of different N application methods on yield, N<sub>2</sub>O emission of maize. *Journal of Agricultural Resources and Environment*, 30(5), 76-80 (In Chinese with English abstract).
- Liu H. et al., 2015. Effect of different cultivation techniques on CH<sub>4</sub> and N<sub>2</sub>O emissions in paddy season. *Ecology and Environmental Sciences*, 24(6), 1022-1027 (In Chinese with an English abstract).
- Liu H. et al., 2018. Effects of different ways of returning cotton straw to the field on the growth and yield of cotton. *Xinjiang Agricultural Sciences*, 55(9), 1710-1716 (In Chinese with an English abstract).
- Liu J. et al., 2017. Effect of straw returning on soil physical and chemical properties and wheat yield. *Journal of Hebei Agricultural Sciences*, 21, 44-48 (In Chinese with an English abstract).
- Liu Q. et al., 2016. Effects of different mulching measures on soil N<sub>2</sub>O flux in rainfed winter wheat fields in the Loess Plateau of China. *Agricultural Research in the Arid Areas*, 34(3), 115-122 (In Chinese with an English abstract).
- Liu S. et al., 2014. Differential responses of crop yields and soil organic carbon stock to fertilization and rice straw incorporation in three cropping systems in the subtropics. *Agriculture, Ecosystems and Environment*, 184, 51-58.
- Liu T. et al., 2018. Differently improved soil micro-environment and seedling growth of *Amorpha fruticosa* by plastic, sand and straw mulching in a saline wasteland in northwest China. *Ecological Engineering*, 122, 126-134.
- Liu W. et al., 2016. Greenhouse gas emissions, soil quality, and crop productivity from a mono-rice cultivation system as influenced by fallow season straw management. *Environmental Science and Pollution Research*, 23, 315-328.
- Liu X. et al., 2017. Effects of biochar and straw return on CO<sub>2</sub> and N<sub>2</sub>O emissions from farmland in the North China Plain. *Acta Ecologica Sinica*, 37(20), 6700-6711 (In Chinese with an English abstract).
- Liu X. et al., 2018. Effects of different straw returning methods on soil microbial biomass carbon, nitrogen and winter yield in Guanzhong Plain. *Journal of Soil and Water Conservation*, 32(4), 170-176 (In Chinese with an English abstract).
- Liu Z. et al., 2017. Comparison of soil organic carbon stability and greenhouse gas emissions potential under straw or straw-derived biochar amendment. *Chinese Journal of Soil Science*, 48(6), 1371-1378 (In Chinese with an English abstract).
- Liu Z. et al., 2017. Effects of tillage, mulching and N management on yield, water productivity, N uptake and residual soil nitrate in a long-term wheat-summer maize cropping system. *Field Crops Research*, 213, 154-164.
- Long Z. et al., 2019. Effects of cotton straw biochar returning and N application rate on soil organic nitrogen fractions in cotton field. *Journal of Shihezi University(Natural Science)*, 37(2), 154-161 (In Chinese with an English abstract).
- Lou Y. et al., 2011. Return rate of straw residue affects soil organic C sequestration by chemical

- fertilization. *Soil and Tillage Research*, 113, 70-73.
- Lu W. et al., 2016. Effects of different straw mulching on soil nutrients and yield of *Sagittaria sagittaria*. *Shanghai Vegetables*, (4), 44-46 (In Chinese with English abstract).
- Luo C. et al., 2020. Dual plastic film and straw mulching boosts wheat productivity and soil quality under the El Nino in semiarid Kenya. *Science of the Total Environment*, 738, 139808.
- Luo Y. et al., 2000. Effects of wheat straw mulching on maize yield and soil physicochemical properties. *Tillage and Cultivation*, (06), 26 (In Chinese with an English abstract).
- Lv R et al., 2015. Effects of tillage on soil physical and chemical properties and enzyme activities under soybean and wheat rotation. *Jiangsu Agricultural Sciences*, 43(1), 100-103 (In Chinese with English abstract).
- Ma E. et al., 2010. Effects of rice straw returning methods on N<sub>2</sub>O emission during wheat-growing season. *Nutrient Cycling in Agroecosystems*, 88, 463-469.
- Ma J. et al., 2007. Effects of nitrogen fertiliser and wheat straw application on CH<sub>4</sub> and N<sub>2</sub>O emissions from a paddy rice field. *Australian Journal of Soil Research*, 45, 359-367.
- Ma J. et al., 2009. Wheat straw management affects CH<sub>4</sub> and N<sub>2</sub>O emissions from rice fields. *Soil Biology and Biochemistry*, 41, 1022-1028.
- Ma L. et al., 2019. Growth and yield of cotton as affected by different straw returning modes with an equivalent carbon input. *Field Crops Research*, 243, 107616.
- Ma L. et al., 2021. Responses of greenhouse gas emissions to different straw management methods with the same amount of carbon input in cotton field. *Soil and Tillage Research* 213, 105126.
- Ma X. et al., 2020. Effects of cultivation patterns on greenhouse gases emissions and yield in corn field. *Environmental Science and Technology*, 43(1), 71-77 (In Chinese with an English abstract).
- Ma Y. et al., 2019. The global warming potential of straw-return can be reduced by application of straw-decomposing microbial inoculants and biochar in rice-wheat production systems. *Environmental Pollution*, 252, 835-845.
- Malhi S. et al., 2006. Tillage, nitrogen and crop residue effects on crop yield, nutrient uptake, soil quality, and greenhouse gas emissions. *Soil and Tillage Research*, 90, 171-183.
- Malhi SS. et al., 2007. Tillage, crop residue and N fertilizer effects on crop yield, nutrient uptake, soil quality and nitrous oxide gas emissions in a second 4-yr rotation cycle. *Soil and Tillage Research*, 96, 269-283.
- Malhi SS. et al., 2011. Improving crop yield and N uptake with long-term straw retention in two contrasting soil types. *Field Crops Research*, 124, 378-391.
- Maneepitak S. et al., 2019. Effect of water and rice straw management practices on soil organic carbon stocks in a double-cropped paddy field. *Communications in Soil Science and Plant Analysis*, 18, 2330-2342.
- Masvaya E. et al., 2017. Tillage, mulch and fertiliser impacts on soil nitrogen availability and maize production in semi-arid Zimbabwe. *Soil and Tillage Research*, 168, 125-132.
- Margenot, A. et al., 2017. Can conservation agriculture improve phosphorus (P) availability in weathered soils? Effects of tillage and residue management on soil P status after 9 years in a Kenyan Oxisol. *Soil and Tillage Research*, 166, 157-166.
- Meena M. et al., 2020. Effect of tillage and irrigation interactions on soil water dynamics, root growth and water use efficiency of wheat in the Indo-Gangetic Plain. *Journal of the Indian*

- Society of Soil Science, 68(3), 275-286.
- Mei N. et al., 2017. Effects of tillage and straw management on brown soil physical and chemical properties and maize yield. *Journal of Maize Sciences*, 25(6), 87-9 (In Chinese with an English abstract).
- Meng S. et al., 2012. Effects of the applied amount of wheat straw on methane, carbon dioxide, nitrous oxide, and nitric oxide fluxes of a bare soil in south shanxi. *Climatic and Environmental Research (in Chinese)*, 17 (4), 504-514 (In Chinese with an English abstract).
- Mi W. et al., 2019. Soil organic carbon and its labile fractions in paddy soil as influenced by water regimes and straw management. *Agricultural Water Management*, 224, 105752.
- Miller J. et al., 2018. Influence of long-term application of stockpiled feedlot manure with straw or wood-chip bedding on net nitrogen mineralization and nitrification in a clay loam soil. *Canadian Journal of Soil science*, 54-60.
- Motazedian A. et al., 2019. Sweet corn growth and GrainYield as influenced by irrigation and wheat residue management. *Agricultural Water Management*, 224, 105748.
- Mrabet R. 2011. Effects of residue management and cropping systems on wheat yield stability in a semiarid mediterranean clay soil. *American Journal of Plant Sciences*, 2, 202-216.
- Muhammad W. et al., Crop residues and fertilizer nitrogen influence residue decomposition and nitrous oxide emission from a Vertisol. *Biology and Fertility of Soils*, 2011, 47(1):15-23.
- Mutegi James K. et al., 2010. Nitrous oxide emissions and controls as influenced by tillage and crop residue management strategy. *Soil Biology and Biochemistry*, 42, 1701-1711.
- Nan Q. et al., 2020. Biochar amendment pyrolysed with rice straw increases rice production and mitigates methane emission over successive three years. *Waste Management*, 118, 1-8.
- Nan X., 2017. Effects of N fertilizer combined biochar and straw amendments on soil and wheat NP contents and N:P ratio. *Gansu Agricultural University (In Chinese with an English abstract)*.
- Naser HM. et al., 2007. Methane emissions from five paddy fields with different amounts of rice straw application in central Hokkaido, Japan. *Soil Science and Plant Nutrition*, 53(1), 95-101.
- Nath P. et al., Impact of variable tillage based residue management and legume based cropping for seven years on enzymes activity, soil quality index and crop productivity in rice ecology. *Environmental and Sustainability Indicators*, 10, 100107.
- Nett L. et al., 2016. Emissions of nitrous oxide and ammonia after cauliflower harvest are influenced by soil type and crop residue management. *Nutrient Cycling in Agroecosystems*, 106(2), 1-15.
- Negassa W. et al., 2015. Cover crop and tillage systems effect on soil CO<sub>2</sub> and N<sub>2</sub>O fluxes in contrasting topographic positions. *Soil and Tillage Research*, 154, 64-74.
- Nett L. et al., 2015. Emissions of nitrous oxide and ammonia from a sandy soil following surface application and incorporation of cauliflower leaf residues. *Journal of Agricultural Science*, 153, 1341-1352.
- Pan Y. et al., 2014. Effects of conservation tillage on Soil CO<sub>2</sub> and N<sub>2</sub>O emission during the following winter-wheat season. *Environmental Science*, 35(7), 2772-2776 (In Chinese with an English abstract).
- Pang D. et al., 2016. Effect of returning methods of maize straw and nitrogen treatments on soil

- physicochemical property and yield of winter wheat. *Acta Agronomica Sinica*, 42(11), 1689-1699 (In Chinese with an English abstract).
- Pang L. and Huang G., 2006. Impact of different tillage method on changing of soil organic carbon in semi-arid area. *Journal of Soil and Water Conservation*, 20(3), 110-113 (In Chinese with an English abstract).
- Pei S. et al., 2012. Greenhouse gas emission under the treatments of fertilization and wheat straw returning during the maize growing seasons. *Environmental Chemistry*, 31(4), 407-414 (In Chinese with an English abstract).
- Phongpan S. and Mosier A., 2003. Impact of organic residue management on nitrogen use efficiency in an annual rice cropping sequence of lowland Central Thailand. *Nutrient Cycling in Agroecosystems*, 66, 233-240.
- Pinheiro P. et al., 2019. N<sub>2</sub>O emission increases with mulch mass in a fertilized sugarcane cropping system. *Biology and Fertility of Soils*, 55, 511-523.
- Pitombo LM. et al. 2017. Straw preservation reduced total N<sub>2</sub>O emissions from a sugarcane field. *Soil Use and Management*, 33, 583-594.
- Poeplau C. et al., 2015. Low stabilization of aboveground crop residue carbon in sandy soils of Swedish long-term experiments. *Geoderma*, 237-238, 246-255.
- Polthanee A. et al., 2008. Effect of rice straw management and organic fertilizer application on growth and yield of dry direct-seeded rice. *Paddy and Water Environment*, 6(2):237-241.
- Qi J et al., 2020. Effects of tillage management on soil carbon decomposition and its relationship with soil chemistry properties in rice paddy fields. *Journal of Environmental Management*, 279(1), 111595.
- Qin D. et al., 2017. Effects of cotton stalk returning on soil physical and chemical properties and cotton yield in coastal saline-alkali soil, *Acta Agronomica Sinica*, 43(7), 1030-1042 (In Chinese with English abstract).
- Qiao D. et al., 2018. Effect of bochar and straw with chemical fertilizers on soil aggregate distribution and organic carbon content in yellow cinnamon soil. *Soil and Fertilizer Sciences in China*, 3, 92-99 (In Chinese with an English abstract).
- Qin Y. et al., 2014. Dynamics and interrelationship of CO<sub>2</sub> emissions and dissolved organic carbon in soils with crop residue retention under different tillage. *Journal of Agro-Environment Science Practices*, 33(7), 1442-1449 (In Chinese with an English abstract).
- Qiu Y. et al., 2020. Long-term effects of gravel mulching and straw mulching on soil physicochemical properties and bacterial and fungal community composition in the Loess Plateau of China, *European Journal of Soil Biology*, 98, 103188.
- Roldan A. et al., 2003. No-tillage, crop residue additions, and legume cover cropping effects on soil quality characteristics under maize in Patzcuaro watershed (Mexico). *Soil and Tillage Research*, 72, 65-73.
- Roosbeh M. et al., 2021. Effects of residue management and nitrogen fertilizer rates on accumulation of soil residual nitrate and wheat yield under no-tillage system in south-west of Iran. *International Soil and Water Conservation Research*, 9, 116-126.
- Saha S. et al., 2010. Effect of tillage and residue management on soil physical properties and crop productivity in maize (*Zea mays*)-Indian mustard (*Brassica juncea*) system. *Indian Journal of Agricultural Sciences*, 80 (8): 679-85.
- Saikia R. et al., 2019. Temporal changes in biochemical indicators of soil quality in response to

- tillage, crop residue and green manure management in a rice-wheat system. *Ecological Indicators*, 103, 383-394.
- Sander B. et al., 2014. Methane and nitrous oxide emissions from flooded rice fields as affected by water and straw management between rice crops. *Geoderma*, 235-236, 355-362.
- Sanz-Cobena A. et al., 2014. Do cover crops enhance N<sub>2</sub>O, CO<sub>2</sub> or CH<sub>4</sub> emissions from soil in Mediterranean arable systems? *Science of the Total Environment*, 466-467, 164-174.
- Sass R. et al., 1991. Methane emission from rice fields as influenced by solar radiation, temperature, and straw incorporation. *Global Biogeochemical Cycles*, 5, 335-350.
- Sarkar R. and Kar S., 2011. Optimum N rate for sustainable rice-wheat system under tillage and crop residue management. *Journal of Crop Improvement*, 25(4), 337-355.
- Schmer M. et al., 2014. Tillage and residue management effects on soil carbon and nitrogen under irrigated continuous corn. *Soil Science Society of America Journal*, 78(6), 1988-1996.
- Schmatz R. et al., 2020. How the mass and quality of wheat and vetch mulches affect drivers of soil N<sub>2</sub>O emissions. *Geoderma*, 372, 114395.
- Sharma S. et al., 2021. Nitrogen and rice straw incorporation impact nitrogen use efficiency, soil nitrogen pools and enzyme activity in rice-wheat system in north-western India. *Field Crops Research*, 266, 108131.
- Si X. et al., 2017. Effect of Tillage Method and straw mulching on soil physicochemical properties and peanut yield. *Chinese Agricultural Science Bulletin*, 33(5), 61-65 (In Chinese with an English abstract).
- Si Z. et al., 2016. Effects of ridge tillage and straw mulching on soil physicochemical properties and peanut yield-quality. *Journal of Peanut Science*, 45(2), 30-43 (In Chinese with an English abstract).
- Singh B. and Malhi B., 2006. Response of soil physical properties to tillage and residue management on two soils in a cool temperate environment. *Soil and Tillage Research*, 85, 143-153.
- Singh G. et al., 2007. Manuring and residue management effects on physical properties of a soil under the rice-wheat system in Punjab, India. *Soil and Tillage Research*, 94, 229-238.
- Sharma S. et al., 2008. Effect of crop-residue management on the production and agronomic nitrogen efficiency in a rice- wheat cropping system. *Journal of Plant Nutrition and Soil Science*, 171, 295-302.
- Shao L. et al., 2014. Effects of different soil amendments on greenhouse gas emissions from a cold waterlogged paddy field. *Journal of Agro-Environment Science*, 33(6), 1240-1246 (In Chinese with an English abstract).
- Shen P. et al., 2019. Effects of different mulching measures on soil properties, bacterial community, fruit yield and quality of Luochuan apple orchard in shaanxi province. *Acta Horticulturae Sinica*, 46(5), 817-831 (In Chinese with an English abstract).
- Sheng H. et al., 2018. Impacts of microbial inoculants for straw decomposing on greenhouse gas emission in wheat season of the wheat-rice rotation system. *Journal of Yangzhou University (Agricultural and Life Science Edition)*, 39(2), 29-34 (In Chinese with English abstract).
- Shi S. et al., A 10-year field experiment on biochar amendment: effects on soil fertility. *Soil and Fertilizer Sciences in China*, 6, 16-22 (In Chinese with an English abstract).
- Shu X. et al, 2014. Effects of conservation tillage on physical properties of fluvo-aquic soil.

- Chinese Agricultural Science Bulletin, 30(6), 175-181 (In Chinese with English abstract).
- Sommer R. et al., 2011. Effect of shallow tillage, moldboard plowing, straw management and compost addition on soil organic matter and nitrogen in a dryland barley/wheat-vetch rotation. *Soil and Tillage Research* 115-116, 39-46.
- Sommer R. et al., 2012. Simulating the effects of zero tillage and crop residue retention on water relations and yield of wheat under rainfed semiarid Mediterranean conditions. *Field Crops Research*, 132, 40-52.
- Soon Y., 1998. Crop residue and fertilizer management effects on some biological and chemical properties of a Dark Grey Solod. *Revue Canadienne De La Science Du Sol*, 78(4), 707-713.
- Soon Y. and Lupwayi N., 2012. Straw management in a cold semi-arid region: Impact on soil quality and crop productivity. *Field Crops Research*, 139, 39-46.
- Spedding T. et al., 2004. Soil microbial dynamics in maize-growing soil under different tillage and residue management systems. *Soil Biology Biochemistry*, 36, 499-512.
- Stagnari F. et al., 2014. Effects of straw mulch on growth and yield of durum wheat during transition to Conservation Agriculture in Mediterranean environment. *Field Crops Research*, 167, 51-63.
- Sun G. et al., 2012. Effects of application of pig manure in combination with chemical fertilizers on CH<sub>4</sub> and N<sub>2</sub>O emissions and their greenhouse effects in wheat field. *Journal of Ecology and Rural Environment*, 28(4), 349-354 (In Chinese with an English abstract).
- Sun H. et al., 2002. Effects of controlled-release fertilizer on rice grain yield, nitrogen use efficiency, and greenhouse gas emissions in a paddy field with straw incorporation. *Field Crops Research*, 253, 107814.
- Sun T. et al., 2020. Effects of different tillage managements on black soil physicochemical properties and corn Yield. *Journal of Jilin Agricultural University*, 42(4), 421-426 (In Chinese with English abstract).
- Sun W. et al., 2011. Effect of different ratios of organic manure and chemical fertilizer on improving maize yield and soil physical properties. *Chinese Agricultural Science Bulletin*, 27(03), 80-84 (In Chinese with English abstract).
- Tan Y. et al., 2016. Effect of farmland management on N<sub>2</sub>O and CH<sub>4</sub> emission from winter wheat- summer maize rotation system in North China Plain. *Acta Scientiae Circumstantiae*, 36(7), 2638-2649 (In Chinese with an English abstract).
- Tian S. et al., 2010. Effect of CH<sub>4</sub> uptake flux under different tillage systems in wheat field in the North China Plain. *Acta Ecologica Sinica*, 30(2), 541-548 (In Chinese with English abstract).
- Timalsina HP. et al., 2019. Effect of tillage method, crop residue and nutrient management on growth and yield of wheat in rice-wheat cropping system at Bhairahawa condition. *Agronomy Journal of Nepal*, 5, 52-62.
- Thammasom N. et al., 2016. Biochar and rice straw have different effects on soil productivity, greenhouse gas emission and carbon sequestration in Northeast Thailand paddy soil. *Agriculture and Natural Resources*, 50, 192-198.
- Thapa B. et al., 2018. Effect of tillage, residue management and cropping system on the properties of soil. *International Journal of Applied Science and Biotechnology*, 6(2), 164-168.
- Thidar M. et al., 2020. Mulching improved soil water, root distribution and yield of maize in



- the Loess Plateau of Northwest China. *Agricultural Water Management*, 241,106340.
- Thomsen IK. and Christensen BT., 2004. Yields of wheat and soil carbon and nitrogen contents following long-term incorporation of barley straw and ryegrass catch crops. *Soil Use and Management*, 20, 432-438.
- Toma Y. and Hatano R. 2007. Effect of crop residue C:N ratio on N<sub>2</sub>O emissions from gray lowland soil in Mikasa, Hokkaido, Japan. *Soil Science and Plant Nutrition*, 53(2), 198-205.
- Triberti L. et al., 2008. Can mineral and organic fertilization help sequester carbon dioxide in cropland? *European Journal of Agronomy*, 29, 13-20.
- Usman K. et al., 2014. Response of wheat to tillage plus rice residue and nitrogen management in rice-wheat system. *Journal of Integrative Agriculture*, 13(11), 2389-2398.
- van Groenigen K. et al., 2011. Soil C storage as affected by tillage and straw management: An assessment using field measurements and model predictions. *Agriculture, Ecosystems and Environment*, 140, 218-225.
- Vargas V. et al., 2019. Sugarcane straw, soil temperature, and nitrification inhibitor impact N<sub>2</sub>O emissions from N fertilizer. *BioEnergy Research*, 12, 801-812.
- Vasconcelos A. et al., 2018. Greenhouse gas emission responses to sugarcane straw removal. *Biomass and Bioenergy*, 113,15-21.
- Verhulst N. et al., 2011. Soil water content, maize yield and its stability as affected by tillage and crop residue management in rainfed semi-arid highlands. *Plant Soil*, 344, 73-85.
- Villamil M. et al., 2015. Corn residue, tillage, and nitrogen rate effects on soil carbon and nutrient stocks in Illinois. *Geoderma*, 253-254, 61-66.
- Wan Y. et al., 2009. Field managements affect yield, soil carbon, and greenhouse gases emission of winter wheat in north china plain. *Journal of Agro-Environment Science*, 28(12), 2495-2500 (In Chinese with an English abstract).
- Wang B. et al. 2013. CH<sub>4</sub> uptake and its affecting factors in winter wheat field under different stubble height of straw returning. *Transactions of the Chinese Society of Agricultural Engineering (Transactions of the CSAE)*, 29(5), 170-178 (In Chinese with English abstract).
- Wang B. et al., 2017. Impact of rice straw return methods on CH<sub>4</sub> and N<sub>2</sub>O emissions across a rice-wheat rotation. *Journal of Nanjing Agricultural University*, 40(3), 367-375 (In Chinese with an English abstract).
- Wang F. et al., 2017. Effect of long-term differentiated fertilization on N<sub>2</sub>O emission from a rice-wheat rotated purple soil during wheat growing seasons. *Journal of Southwest University (Natural Science Edition)*, 39(5), 22-30 (In Chinese with an English abstract).
- Wang F. et al., 2018. Effect of combined application of biochar and straw on organic carbon content in purple soil aggregates. *Acta Pedologica Sinica*, 56(04), 929-939 (In Chinese with an English abstract).
- Wang G. et al., 2006. Effect of stubble incorporation and nitrogen fertilization on denitrification and nitrous oxide emission in an irrigated maize soil. *Plant Nutrition and Fertilizer Science*, 12(6), 840-844 (In Chinese with an English abstract).
- Wang H. et al., 2019. Straw incorporation influences soil organic carbon sequestration, greenhouse gas emission, and crop yields in a Chinese rice (*Oryza sativa* L.)-wheat (*Triticum aestivum* L.) cropping system. *Soil and Tillage Research* 195, 104377.
- Wang H. et al., 2020. Effects of long-term no-tillage with different straw mulching frequencies on soil microbial community and the abundances of two soil-borne pathogens. *Applied*

- Soil Ecology, 148, 103488.
- Wang J. et al., 2013. Characteristics of greenhouse gases emissions and their global warming potential in double sequence rotation system with different tillage methods. Chinese Journal of Soil Science, 44(1), 57-63 (In Chinese with an English abstract).
- Wang J. et al., 2011. Effect of tillage pattern on soil greenhouse gases (CO<sub>2</sub>, CH<sub>4</sub> and N<sub>2</sub>O) fluxes in semi-arid temperate regions. Chinese Journal of Eco-Agriculture, 19(6), 1295-1300 (In Chinese with an English abstract).
- Wang J. et al., 2020. Metagenomic analysis reveals the effects of cotton straw-derived biochar on soil nitrogen transformation in drip-irrigated cotton field. Environmental Science and Pollution Research, 1-13.
- Wang L. et al., 2020. Inclusion of microbial inoculants with straw mulch enhances grain yields from rice fields in central China. Food Energy Secur, 00, e230.
- Wang Q. et al., 2018. Effect of long-term straw mulching and no-tillage on physical properties of meadow soil in cold region. Chinese Journal of Applied Ecology, 29(9) , 2943-2948 (In Chinese with an English abstract).
- Wang Q. et al., 2019. Effects of long-term wheat straw returned to field on crop yield and soil chemical properties in soybean-wheat rotation areas. Transactions of the Chinese Society of Agricultural Engineering (Transactions of the CSAE), 35(24), 113-120 (In Chinese with English abstract).
- Wang S. et al., 2015. Effects of deeply and concentratedly returned straw on soil main properties and corn root system. Agricultural Research in the Arid Areas, 33(3), 68-78 (In Chinese with an English abstract).
- Wang W. et al., 2019. Impact of straw management on seasonal soil carbon dioxide emissions, soil water content, and temperature in a semi-arid region of China. Science of the Total Environment, 652, 471-482.
- Wang X. et al., 2015. Maize straw effects on soil aggregation and other properties in arid land. Soil and Tillage Research, 153, 131-136.
- Wang X. et al., 2016. Effects of soil tillage and straw return on wheat yield and greenhouse gases emission. Journal of Yangzhou University (Agricultural and Life Science Edition), 37(3), 101-106 (In Chinese with an English abstract).
- Wang X. et al., 2017. Effects of tillage and straw returning on soybean yield and soil physicochemical properties in Yellow-Huai-Hai Rivers Valley. Chinese Journal of Oil Crop Sciences, 39(6), 834-841 (In Chinese with an English abstract).
- Wang Y. et al., 2016. Effects of rice straw mulching on CO<sub>2</sub> emission from upland soil. Ecology and Environmental Sciences, 25(11), 1842-1847 (In Chinese with an English abstract).
- Wang Y. et al., 2018. Effects of deep tillage treatment on summer maize yield and soil physicochemical properties. Journal of Shanxi Agricultural University (Natural Science Edition), 38(2), 009 (In Chinese with an English abstract).
- Wang Y. et al., 2019. Effects of different straw returning methods on soil properties and Corn growth in Yanghuang irrigation area of ningxia. Southwest China Journal of Agricultural Sciences, 32(11), 2607-2614 (In Chinese with an English abstract).
- Wang Z. et al., 2021. Effects of straw return depth on soil organic carbon, nitrogen content, and soil enzyme activity of spring maize field. Journal of Agricultural Resources and Environment, 38(04):636-646 (In Chinese with an English abstract).

- Wei A. et al., 2019. Effects of tillage methods and straw return on soil properties, metabolism of microbial carbon source and wheat yield. *Agricultural Research in the Arid Areas*, 37(6), 145-152 (In Chinese with an English abstract).
- Wu A. et al., 2019. Effect of application of biochar and straw on fate of fertilizer N in cinnamon soil. *Acta Pedologica Sinica*, 56(1), 176-185 (In Chinese with an English abstract).
- Wu F. et al., 2008. Characteristics of CH<sub>4</sub> emission and greenhouse effects in double paddy soil with conservation tillage. *Scientia Agricultura Sinica*, 41(9), 2703-2709 (In Chinese with English abstract).
- Wu K. et al., 2019. Effects of stabilized N fertilizer combined with straw returning on rice yield and emission of N<sub>2</sub>O and CH<sub>4</sub> in a paddy field. *Chinese Journal of Applied Ecology*, 30(4), 1287-1294 (In Chinese with an English abstract).
- Wu J. et al., 2006. Influences of straw mulching treatment on soil physical and chemical properties and crop yields. 19(2), 192-195 (In Chinese with an English abstract).
- Wu J. et al., 2012. Effects of continuous straw mulching on soil physical and chemical properties and crop yields in paddy-upland rotation system. *Plant Nutrition and Fertilizer Science*, 18(3), 587-594 (In Chinese with an English abstract).
- Wu X. et al., 2018. Effects of rice straw mulching on N<sub>2</sub>O emissions and maize productivity in a rain-fed upland. *Environmental Science and Pollution Research*, 25, 6407-6413.
- Xie Y. et al., 2016. Effects of short-time conservation tillage managements on greenhouse gases emissions from soybean-winter wheat rotation system. *Environmental Science*, 37(4), 1499-15506 (In Chinese with an English abstract).
- Xu C. et al., 2019. Crop straw incorporation interacts with N fertilizer on N<sub>2</sub>O emissions in an intensively cropped farmland. *Geoderma*, 341, 129-137.
- Xu C. et al., 2020. Crop straw incorporation alleviates overall fertilizer-N losses and mitigates N<sub>2</sub>O emissions per unit applied N from intensively farmed soils: an in situ <sup>15</sup>N tracing study. *Science of The Total Environment*.
- Xu H. et al., Effects of Nitrogen fertilizer and straw returning methods on N<sub>2</sub>O emissions in wheat-maize rotational soils. *Environmental Science*, 41(12), 5668-5676 (In Chinese with an English abstract).
- Xu J. et al., 2016. Effect of Garlic Straw on Physical and Chemical Characteristics of Continuous Cropping Soil and Root Activity of Tomato in Solar Greenhouse. *Soil and Fertilizers*, (01), 152-156 (In Chinese with English abstract).
- Xu Q. et al., 2019. Elevated CO<sub>2</sub> alters the rhizosphere effect on crop residue decomposition. *Plant Soil*, 436, 413-426.
- Xu Y. et al., 2015. Effects of corn straw returning and nitrogen fertilizer application methods on N<sub>2</sub>O emission from wheat growing season. *Journal of Agricultural Resources and Environment*, 32(6), 552-558 (In Chinese with an English abstract).
- Xu Y. et al., 2015. Soil N<sub>2</sub>O emission and its agronomic efficiency under different tillage. *Chinese Journal of Eco-Agriculture*, 23(11), 1349-1358 (In Chinese with English abstract).
- Xu Y. et al., 2016. Effects of greenhouse gas emission under different agricultural management practices in wheat field in the North China Plain. *Soil and Fertilizer Sciences in China*, (2) (In Chinese with English abstract).
- Xie W. et al., 2014. Effects of wheat straw return ways on integrated global warming effect from dryland soil in North China Plain. *Soils*, 46(6), 1010-1016 (In Chinese with an English abstract).

- abstract).
- Xu G. et al., 2009. Effect of Wheat-Residue Application on Physical and Chemical Characters and Enzymatic Activities in Soil. *Scientia Agricultura Sinica*, 42(3), 934-942 (In Chinese with an English abstract).
- Xu Y. et al., 2016. Effects of greenhouse gas emission under different agricultural management practices in wheat field in the North China Plain. *Soil and Fertilizer Sciences in China*, 2, 7 (In Chinese with an English abstract).
- Yadav G. et al., 2020. No-till and mulching enhance energy use efficiency and reduce carbon footprint of a direct-seeded upland rice production system. *Journal of Cleaner Production*, 271, 122700.
- Yadvinder-Singh. et al., 2009. Nitrogen and residue management effects on agronomic productivity and nitrogen use efficiency in rice-wheat system in Indian Punjab. *Nutrient Cycling in Agroecosystems*, 84(2), 141-154.
- Yan C. et al., 2011. Effect of corn straw returned to soil and N application on growth, water and nitrogen use efficiency of winter wheat. *Chinese Journal of Eco-Agriculture*, 19(2), 271-275 (In Chinese with an English abstract).
- Yan C. et al., 2016. Greenhouse gas exchange and comprehensive global warming potential under different wheat-maize rotation patterns. *Chinese Journal of Eco-Agriculture*, 24(6), 704-715 (In Chinese with an English abstract).
- Yan J. et al., 2005. Effect of conservation tillage on physical properties and crop yields. *Chinese Agricultural Mechanization*, 02, 31-34 (In Chinese with English abstract).
- Yang H. et al., 2016. Effect of maize stalk returning on nitrous oxide emission in arable brown earth. *Chinese Journal of Soil Science*, 47(3), 660-665 (In Chinese with an English abstract).
- Yang J. et al., 2015. Life cycle energy consumption and greenhouse gas emissions of wheat-rice rotation system with straw returning. *Journal of Agro-Environment Science*, 34(1), 196-204 (In Chinese with an English abstract).
- Yang L. et al., 2014. Modeling impacts of alternative farming management practices on carbon sequestration and mitigating N<sub>2</sub>O emissions from spring maize fields. *Journal of Plant Nutrition and Fertilizer*, 20(1), 75-86 (In Chinese with an English abstract).
- Yao Z. et al., 2017. Straw return reduces yield-scaled N<sub>2</sub>O plus NO emissions from annual winter wheat-based cropping systems in the North China Plain. *Science of the Total Environment*, 590-591, 174-185.
- Ye G. et al., 2017. Quantitative analysis of straw returning on annual soil N<sub>2</sub>O emission in the wheat-maize rotation system. *Journal of Plant Nutrition and Fertilizer*, 23(3), 589-596 (In Chinese with an English abstract).
- Yuan M. et al., 2018. Soil N<sub>2</sub>O emissions as affected by long-term residue removal and no-till practices in continuous corn. *Global Change Biology Bioenergy*, 10, 972-985.
- Zhang A. et al., 2017. Contrasting effects of straw and straw-derived biochar application on net global warming potential in the Loess Plateau of China. *Field Crops Research*, 205, 45-54.
- Zhang D. et al., 2009. Effects of Straw-returning and different tillage modes on physical and chemical properties of direct seeding paddy soil. *Acta Agriculturae Jiangxi*, 21(8), 53-56 (In Chinese with an English abstract).
- Zhang G. et al., 2009. Effects of rice straw incorporation and land management in winter on methane emission during rice-growing season. *Journal of Agro-Environment Science*,

- 28(12):2501-2505 (In Chinese with English abstract).
- Zhang H. et al., 2013. The Effect of management practices on the emission of CO<sub>2</sub> and N<sub>2</sub>O from the winter wheat field in North China Plain. *Chinese Journal of Soil Science*, 44(3), 653-659 (In Chinese with English abstract).
- Zhang H. et al., 2015. Effects of years of straw return to soil on greenhouse gas emission in rice/wheat rotation systems. *Chinese Journal of Eco-Agriculture*, 23(3), 302-308 (In Chinese with an English abstract).
- Zhang J. et al., 2016. Effect of conservative tillage on physical and chemical characteristics under a pea-wheat rotation system in the Loess Plateau. *Journal of Desert Research*, 36(1), 138-143 (In Chinese with an English abstract).
- Zhang J. et al., 2017. Interactive effects of straw incorporation and tillage on crop yield and greenhouse gas emissions in double rice cropping system. *Agriculture Ecosystems and Environment*, 250, 37-43.
- Zhang L. et al., 2015. Integrative effects of soil tillage and straw management on crop yields and greenhouse gas emissions in a rice-wheat cropping system. *European Journal of Agronomy*, 63, 47-54.
- Zhang M. et al., 2007. Soil properties and barley yield under a twenty years experiment of tillage, straw management and nitrogen application rate in the sub-arctic area of Alaska. *Acta Agriculture Scandinavica Section B-Soil and Plant Science*, 57(4), 374-382.
- Zhang Q. et al., 2020. Effects of different depths of straw returning to field on soil physical properties and profile changes of yellow brown soil. *Chinese Journal of Soil Science*, 51(2), 308-314 (In Chinese with English abstract).
- Zhang R. et al., 2019. Effects of intercropping mulch on the content and composition of soil dissolved organic matter in apple orchard on the loess plateau. *Journal of Environmental Management*, 250, 109531.
- Zhang S. et al., 2015. Effects of straw returning on soil nutrition in paddy field. *Heilongjiang Agricultural Sciences*, (12), 41-43 (In Chinese with an English abstract).
- Zhang W., 2016. The impacts of different straw returning forms and rice varieties on CH<sub>4</sub> and N<sub>2</sub>O emissions in a double rice field. *Graduate School of Agricultural Environment and Sustainable Development* (In Chinese with an English abstract).
- Zhang X. et al., 2012. Straw application altered CH<sub>4</sub> emission, concentration and <sup>13</sup>C-isotopic signature of dissolved CH<sub>4</sub> in a rice field. *Pedosphere*, 22(1), 13-21.
- Zhang X. et al., 2013. Effects of farming managements on the global warming potentials of CH<sub>4</sub> and N<sub>2</sub>O from a rice-wheat rotation system based on the analysis of DNDC modeling. *Chinese Journal of Applied Ecology*, 24(3), 690-696 (In Chinese with an English abstract).
- Zhang X et al., 2016. Effects of biochar and straw return on mineral nitrogen and pH of the surface soil in farmland of the North China Plain. *Chinese Journal of Agrometeorology*, 37(2), 131-142 (In Chinese with an English abstract).
- Zhang X., 2018. Effects of straw returning on soil physicochemical properties and wheat yield. *South China Agriculture*, 12(21), 191-193 (In Chinese with an English abstract).
- Zhang Y. et al., 2009. Effects of wheat straw returning and soil tillage on CH<sub>4</sub> and N<sub>2</sub>O emissions in paddy season. *Ecology and Environmental Sciences*, 18(6), 2334-2338 (In Chinese with an English abstract).
- Zhang Y. et al., 2012. Preliminary study on effect of straw incorporation on net global warming

- potential in high production rice-wheat double cropping systems. *Journal of Agro-Environment Science*, 31(8), 1647-1653 (In Chinese with an English abstract).
- Zhang Y. et al., 2018. The effects of rice straw and biochar applications on the microbial community in a soil with a history of continuous tomato planting history. *Agronomy*, 8, 65.
- Zhang Y. et al., 2018. Effects of different tillage patterns on soil physical and chemical properties and maize growth in black soil region. *Jiangsu Agricultural Sciences*, 46(18), 58-64 (In Chinese with English abstract).
- Zhang Z. et al., 2014. The effects of rape residue mulching on net global warming potential and greenhouse gas intensity from no-tillage paddy fields. *The Scientific World Journal*, 2014, 198231.
- Zhang Z. et al., 2015. Effect of direct-seeding with non-flooding and wheat residue returning patterns on greenhouse gas emission from rice paddy. *Agricultural Science and Technology*, 16(1), 16-21.
- Zhang Z. et al., 2020. Effect of different improvement modes on physical and chemical characters of the coastal saline soil. *Ecology and Environmental Sciences*, 29(2), 275-284 (In Chinese with English abstract).
- Zhao H, et al., 2019. Straw mulch as an alternative to plastic film mulch: Positive evidence from dryland wheat production on the Loess Plateau. *Science of the Total Environment*, 676,782-791.
- Zhao H. et al., 2018. Effect of straw returning manners on seedbed soil physical properties and winter wheat growth. *Transactions of the Chinese Society for Agricultural Machinery*, 49(S1), 60-67 (In Chinese with an English abstract).
- Zhao J et al., 2019. Effects of straw return and tillage on soil properties and yield of multi-cropping peanut after wheat. *Journal of Soil and Water Conservation*, 33(5), 272-287 (In Chinese with an English abstract).
- Zhou B. et al., 2019. Straw mulching under a drip irrigation system improves maize grain yield and water use efficiency. *Crop Science*, 59(6), 2806-2819.
